# Supplementary material for: Bioactive Absorbent Chitosan Aerogels Reinforced with Bay Tree Pruning Waste Nanocellulose with Antioxidant Properties for Burger Meat Preservation
Source: MDPI journal article supplement (doi:10.3390/polym15040866), 2023-02-09

# Bioactive absorbent chitosan aerogels reinforced with bay tree pruning waste nanocellulose with antioxidant properties for burger meat preservation

**Figure S1.** SEM micrographs of (a) unbleached cellulose pulp, (b) bleached cellulose pulp and (c) nanofibrillation process of the fiber.

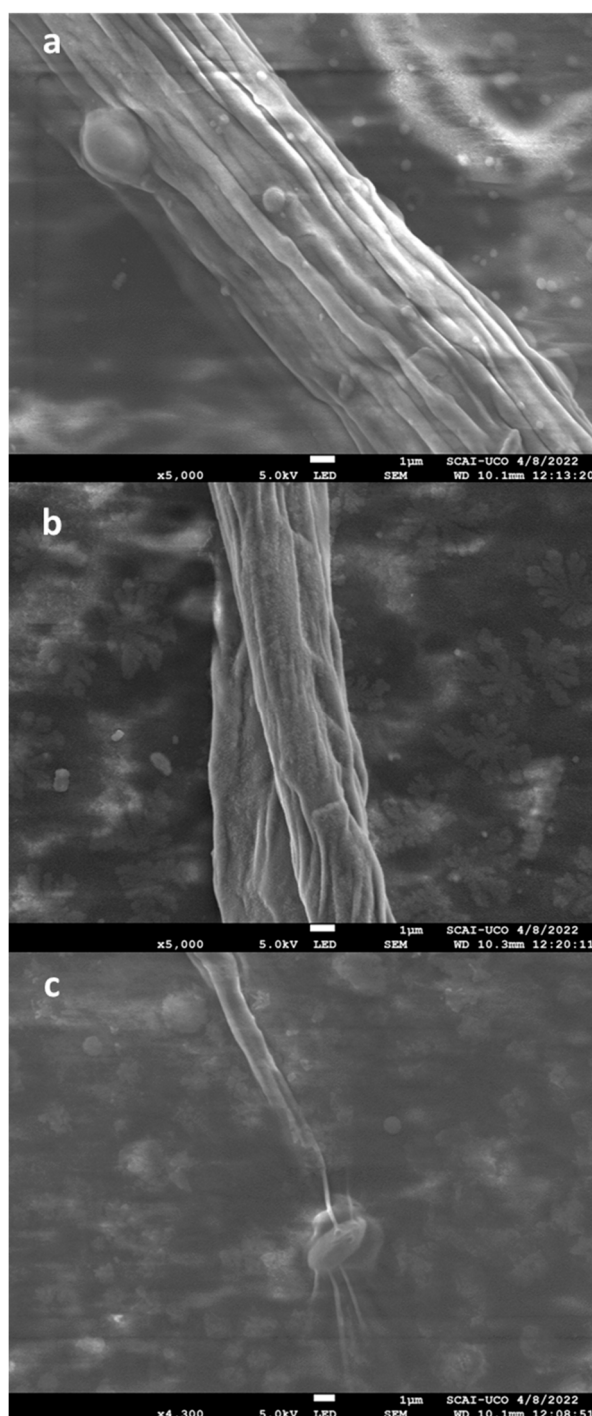

**Figure S2.** FTIR spectra (a) and XRD patterns (b) of bay tree pruning unbleached and bleached pulp, lignocellulose micro/nanofibers (LCMNF) and cellulose micro/nanofibers (CMNF).

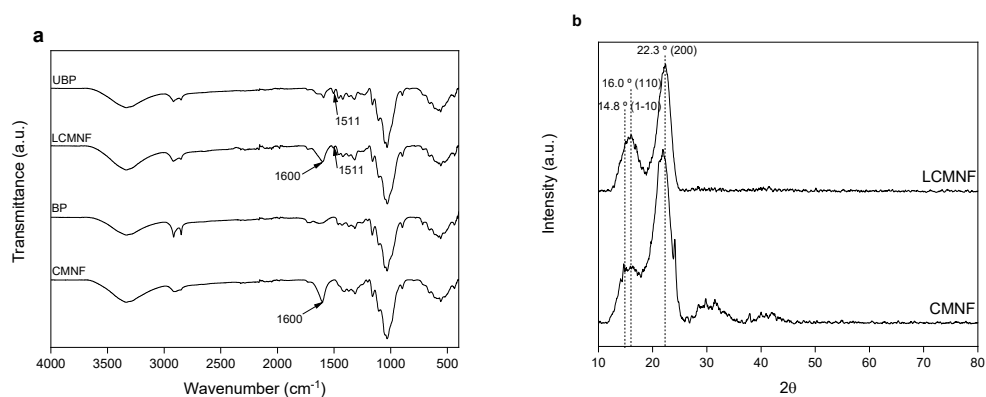

**Figure S3.** FTIR spectra (a,b) and XRD patterns (c,d) of 100% CH, LCMNF-CH and CMNF-CH aerogels.

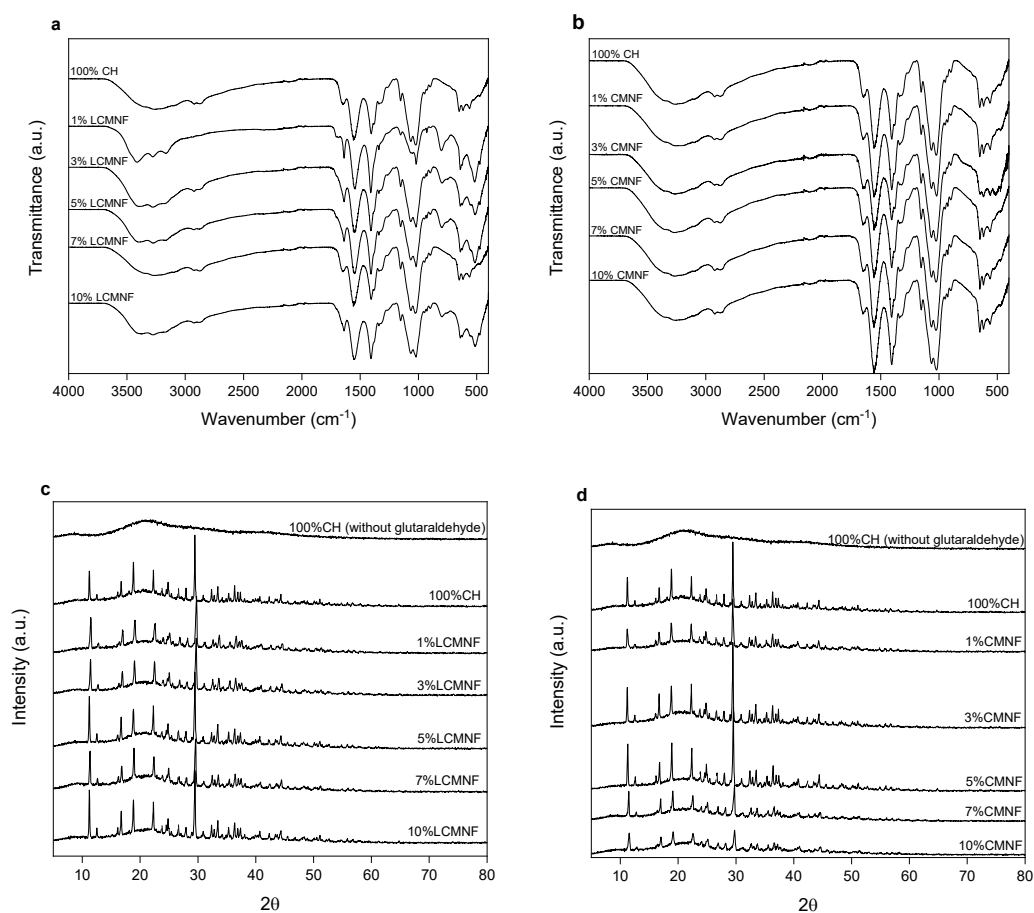

**Figure S4.** SEM images of (a) 100%CH, (b)5%LCMNF, (c)5%CMNF and (d)LCMNF+20%BT aerogels.

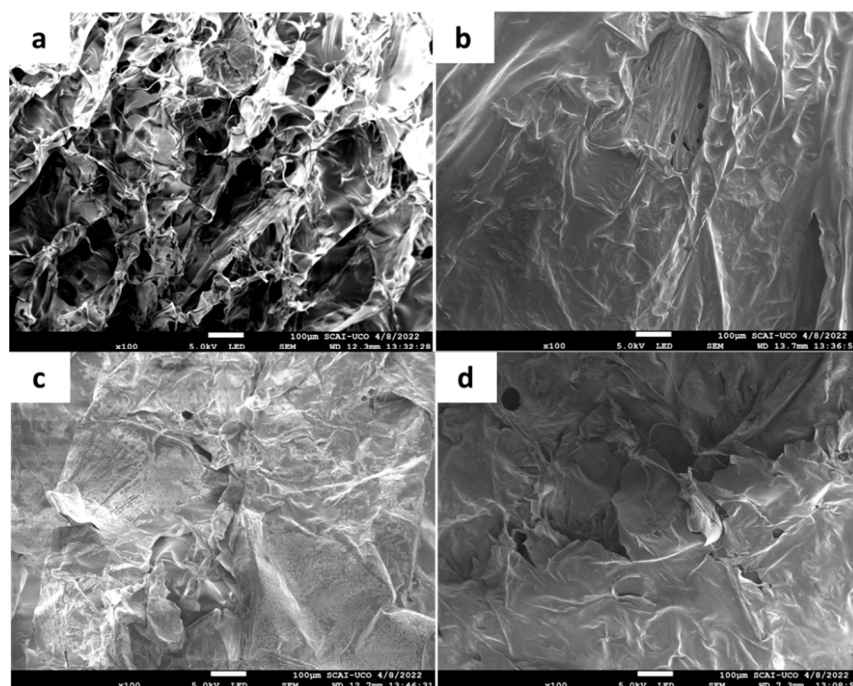

**Figure S5.** Young's Modulus of reinforced-CH aerogels.

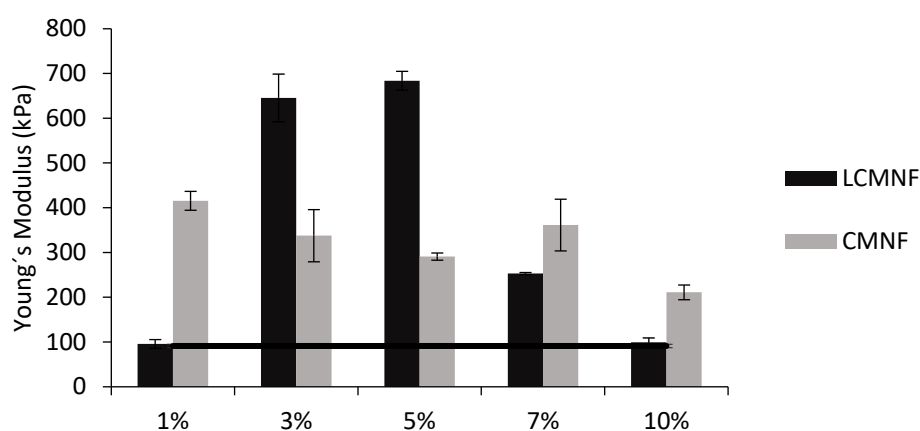

**Figure S6.** FTIR spectra of bioactive aerogels.

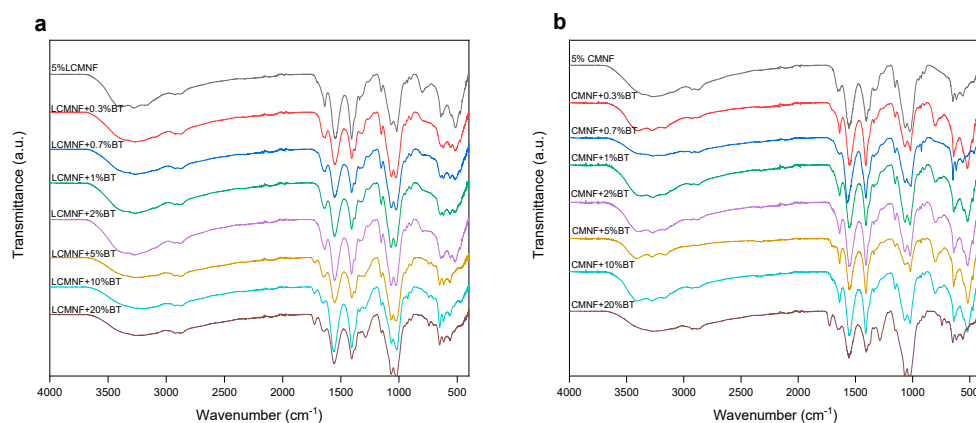

**Figure S7.** Mechanical properties of bioactive aerogels.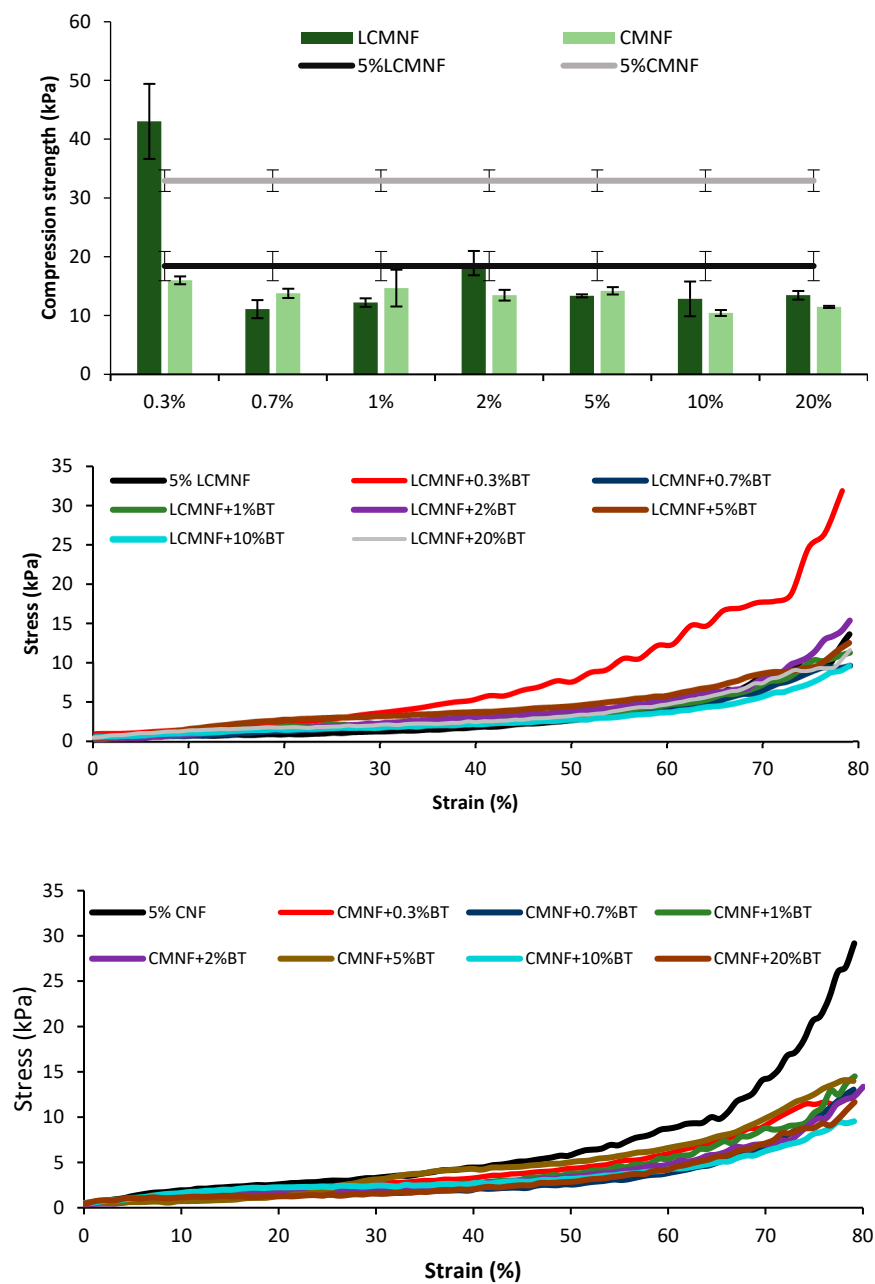

Supplement: s1 [file s1]
